# Supplementary material
Source: HighWire-hosted journal article supplement (https://bjgp.org/highwire/filestream/27607/field_highwire_adjunct_files/0/bjpg56-869TableS1.pdf)
Supplement: bjpg56-869TableS1.pdf [file bjpg56-869TableS1.pdf]

Supplementary Table 1. Analysis of each RIAS category – medians and Kruskal–Wallis tests

| RIAS category               | White         | South Asian<br>fluent | South Asian<br>non-fluent | Kruskal–Wallis |         |
|-----------------------------|---------------|-----------------------|---------------------------|----------------|---------|
|                             | Median (IQR)  | Median (IQR)          | Median (IQR)              | $\chi^2$       | P-value |
| Patient codes               |               |                       |                           |                |         |
| Process                     |               |                       |                           |                |         |
| Social behaviour            | 3 (2–4)       | 2 (1–3)               | 1 (0–1)                   | 44.148         | <0.001  |
| Paraphrase                  | 0 (0–0)       | 0 (0–0)               | 0 (0–0)                   | 0.668          | 0.716   |
| Verbal attention            | 0 (0–0)       | 0 (0–0)               | 0 (0–0)                   | 0.000          | 1.000   |
| Giving directions           | 0 (0–1)       | 0 (0–1)               | 0 (0–0)                   | 6.638          | 0.036   |
| Asking clarification        | 0 (0–0)       | 0 (0–0)               | 0 (0–0)                   | 3.822          | 0.148   |
| Affective                   |               |                       |                           |                |         |
| Agreement                   | 6 (3–9)       | 2 (0–5)               | 0 (0–1)                   | 45.507         | <0.001  |
| Showing concern             | 0 (0–0)       | 0 (0–0)               | 0 (0–0)                   | 4.302          | 0.116   |
| Reassurance                 | 0 (0–0)       | 0 (0–0)               | 0 (0–0)                   | 2.454          | 0.293   |
| Disagreement                | 0 (0–0)       | 0 (0–0)               | 0 (0–0)                   | 0.182          | 0.913   |
| Content                     |               |                       |                           |                |         |
| Asks questions – medical    | 1 (0–3)       | 1 (0–3)               | 0 (0–1.5)                 | 9.878          | 0.007   |
| Asks questions – social     | 0 (0–2)       | 0 (0–0)               | 0 (0–0)                   | 4.780          | 0.092   |
| Gives information – medical | 19 (13–29)    | 18 (6–30)             | 0 (0–5.5)                 | 38.958         | <0.001  |
| Gives information – social  | 1 (0–3)       | 0 (0–1)               | 0 (0–0)                   | 22.844         | <0.001  |
| Counsels/directs – medical  | 0 (0–0)       | 0 (0–0)               | 0 (0–0)                   | 4.490          | 0.106   |
| Counsels/directs – social   | 0 (0–0)       | 0 (0–0)               | 0 (0–0)                   | 0.000          | 1.000   |
| Others                      | 0 (0–1)       | 0 (0–0)               | 0 (0–0)                   | 6.132          | 0.047   |
| GP codes                    |               |                       |                           |                |         |
| Process                     |               |                       |                           |                |         |
| Social behaviour            | 3 (2–4)       | 2 (1–2)               | 1 (0–2)                   | 38.209         | <0.001  |
| Paraphrase                  | 0 (0–0)       | 0 (0–0)               | 0 (0–0)                   | 17.514         | <0.001  |
| Verbal attention            | 0 (0–0)       | 0 (0–0)               | 0 (0–0)                   | 1.609          | 0.447   |
| Giving directions           | 9 (6–13)      | 9 (5–14)              | 6 (4.5–16)                | 0.679          | 0.712   |
| Asking clarification        | 1 (0–2)       | 2 (1–4)               | 3 (1–5.5)                 | 30.325         | <0.001  |
| Affective                   |               |                       |                           |                |         |
| Agreement                   | 2 (0–5)       | 1 (0–2)               | 1 (0–2.5)                 | 13.172         | 0.001   |
| Showing concern             | 0 (0–0)       | 0 (0–0)               | 0 (0–0)                   | 2.678          | 0.262   |
| Reassurance                 | 0 (0–1)       | 0 (0–0)               | 0 (0–1.5)                 | 0.820          | 0.664   |
| Disagreement                | 0 (0–0)       | 0 (0–1)               | 0 (0–0)                   | 0.300          | 0.861   |
| Content                     |               |                       |                           |                |         |
| Asks questions – medical    | 11 (6.25–16)  | 12 (6–20)             | 15 (11–22.5)              | 8.299          | 0.016   |
| Asks questions – social     | 0 (0–0)       | 0 (0–1)               | 0 (0–0)                   | 13.475         | 0.001   |
| Gives information – medical | 11.5 (7–19.7) | 7 (4–11)              | 9 (6–16)                  | 17.004         | <0.001  |
| Gives information – social  | 0 (0–0)       | 0 (0–0)               | 0 (0–0)                   | 8.819          | 0.012   |
| Counsels/directs – medical  | 2 (0–4)       | 2 (1–5)               | 3 (1.5–5.5)               | 4.284          | 0.117   |
| Counsels/directs – social   | 0 (0–0)       | 0 (0–0)               | 0 (0–0)                   | 0.516          | 0.772   |
| Others                      | 1 (0–2)       | 0 (0–1)               | 0 (0–2)                   | 9.189          | 0.010   |
| Other codes                 |               |                       |                           |                |         |
| Process                     |               |                       |                           |                |         |
| Social behaviour            | 0 (0–0)       | 0 (0–0)               | 1 (0–1)                   | 46.220         | <0.001  |
| Paraphrase                  | 0 (0–0)       | 0 (0–0)               | 0 (0–0)                   | 0.000          | 1.000   |
| Verbal attention            | 0 (0–0)       | 0 (0–0)               | 0 (0–0)                   | 0.000          | 1.000   |
| Giving directions           | 0 (0–0)       | 0 (0–0)               | 0 (0–0.5)                 | 26.662         | <0.001  |
| Asking clarification        | 0 (0–0)       | 0 (0–0)               | 0 (0–0)                   | 5.888          | 0.053   |
| Affective                   |               |                       |                           |                |         |
| Agreement                   | 0 (0–0)       | 0 (0–0)               | 0 (0–4.5)                 | 39.113         | <0.001  |
| Showing concern             | 0 (0–0)       | 0 (0–0)               | 0 (0–0)                   | 0.000          | 1.000   |
| Reassurance                 | 0 (0–0)       | 0 (0–0)               | 0 (0–0)                   | 5.207          | 0.074   |
| Disagreement                | 0 (0–0)       | 0 (0–0)               | 0 (0–0)                   | 10.472         | 0.005   |
| Content                     |               |                       |                           |                |         |
| Asks questions – medical    | 0 (0–0)       | 0 (0–0)               | 1 (0–3)                   | 67.841         | <0.001  |
| Asks questions – social     | 0 (0–0)       | 0 (0–0)               | 0 (0–0)                   | 0.800          | 0.670   |
| Gives information – medical | 0 (0–0)       | 0 (0–0)               | 17 (3–27)                 | 76.074         | <0.001  |
| Gives information – social  | 0 (0–0)       | 0 (0–0)               | 0 (0–0)                   | 7.129          | 0.028   |
| Counsels/directs – medical  | 0 (0–0)       | 0 (0–0)               | 0 (0–0)                   | 10.472         | 0.005   |
| Counsels/directs – social   | 0 (0–0)       | 0 (0–0)               | 0 (0–0)                   | 0.000          | 1.000   |
| Others                      | 0 (0–0)       | 0 (0–0)               | 0 (0–0)                   | 17.498         | <0.001  |

P&lt;0.001 = significant.
